# Supplementary material
Source: PubMed Central journal article supplement (PMC6299187)
Supplement: Supplementary_File_1.pdf [file Supplementary_File_1.pdf]

**Supplementary File 1.** Summary table of the risk of bias assessment, based on the Cochrane Systematic Review methodology, for the 12 antipsychotic medications reviewed.

| Type of bias           | Random sequence generation (selection bias) | Allocation concealment (selection bias) | Blinding (performance bias and detection bias): objective outcomes | Blinding (performance bias and detection bias): subjective outcomes | Incomplete outcome data (attrition bias) | Selective reporting (reporting bias) | Other bias |
|------------------------|---------------------------------------------|-----------------------------------------|--------------------------------------------------------------------|---------------------------------------------------------------------|------------------------------------------|--------------------------------------|------------|
| <b>Amisulpride</b>     |                                             |                                         |                                                                    |                                                                     |                                          |                                      |            |
| % low risk studies     | 10%                                         | 10%                                     | 100%                                                               | 0                                                                   | 35%                                      | 0                                    | 0          |
| % unclear risk studies | 90%                                         | 90%                                     | 0                                                                  | 100%                                                                | 15%                                      | 0                                    | 15%        |
| % high risk studies    | 0                                           | 0                                       | 0                                                                  | 0                                                                   | 50%                                      | 100%                                 | 85%        |
| <b>Aripiprazole</b>    |                                             |                                         |                                                                    |                                                                     |                                          |                                      |            |
| % low risk studies     | 12.5%                                       | 2.5-12.5%                               | 0                                                                  | 7.5%                                                                | 22.5-80%                                 | 12.5-22.5%                           | 0-90%      |
| % unclear risk studies | 87.5%                                       | 10-90%                                  | 95-97%                                                             | 87.5%                                                               | 35-87.5%                                 | 0-75%                                | 10-90%     |
| % high risk studies    | 0                                           | 5-87.5%                                 | 3-5%                                                               | 5%                                                                  | 7.5-70%                                  | 0-87.5%                              | 0-10%      |

|                        |          |      |             |        |            |        |        |
|------------------------|----------|------|-------------|--------|------------|--------|--------|
| studies                |          |      |             |        |            |        |        |
| <b>Asenapine</b>       |          |      |             |        |            |        |        |
| % low risk studies     | 0        | 0    | 35%         | 0      | 0          | 20%    | 0      |
| % unclear risk studies | 100%     | 100% | 65%         | 85%    | 20%        | 0      | 0      |
| % high risk studies    | 0        | 0    | 0           | 15%    | 80%        | 80%    | 100%   |
| <b>Chlorpromazine</b>  |          |      |             |        |            |        |        |
| % low risk studies     | 12.5-20% | 5%   | 25-65%      | 10-20% | 55-85%     | 10-65% | 20-90% |
| % unclear risk studies | 75-82.5% | 90%  | 27.5%-67.5% | 70-90% | 0-32.5%    | 5-50%  | 5-70%  |
| % high risk studies    | 2-5%     | 5%   | 7.5%        | 0-10%  | 12.5-17.5% | 25-85% | 5-15%  |
| <b>Clozapine</b>       |          |      |             |        |            |        |        |
| % low risk studies     | 62.5%    | 20%  | 0           | 62.5%  | 62.5%      | 20%    | 20%    |
| % unclear risk studies | 37.5%    | 80%  | 62.5%       | 20%    | 20%        | 42.5%  | 80%    |

|                        |        |         |        |        |          |          |          |
|------------------------|--------|---------|--------|--------|----------|----------|----------|
| studies                |        |         |        |        |          |          |          |
| % high risk studies    | 0      | 0       | 37.5%  | 17.5%  | 17.5%    | 37.5%    | 0        |
| <b>Haloperidol</b>     |        |         |        |        |          |          |          |
| % low risk studies     | 0-10%  | 0       | 10-65% | 5-15%  | 27.5-30% | 5-70%    | 10-52.5% |
| % unclear risk studies | 80-95% | 95-100% | 35-55% | 70-95% | 32.5-35% | 0-70%    | 10-60%   |
| % high risk studies    | 0-10%  | 0-5%    | 0-35%  | 0-15%  | 35-40%   | 25-67.5% | 5-37.5%  |
| <b>Olanzapine</b>      |        |         |        |        |          |          |          |
| % low risk studies     | 15%    | 5%      | 100%   | 2.5%   | 12.5%    | 10%      | 0        |
| % unclear risk studies | 85%    | 95%     | 0      | 97.5%  | 15%      | 2.5%     | 30%      |
| % high risk studies    | 0      | 0       | 0      | 0      | 72.5%    | 87.5%    | 70%      |
| <b>Paliperidone</b>    |        |         |        |        |          |          |          |
| % low risk             | 100%   | 100%    | 100%   | NA     | 70%      | 87.5%    | 0        |

|                    |          |            |        |      |          |        |          |
|--------------------|----------|------------|--------|------|----------|--------|----------|
| studies            |          |            |        |      |          |        |          |
| % unclear risk     | 0        | 0          | 0      |      | 0        | 0      | 100%     |
| studies            |          |            |        |      |          |        |          |
| % high risk        | 0        | 0          | 0      |      | 30%      | 12.5%  | 0        |
| studies            |          |            |        |      |          |        |          |
| <b>Quetiapine</b>  |          |            |        |      |          |        |          |
| % low risk         | 15-17.5% | 7.5-12.5%  | 0-5%   | 90%  | 15-80%   | 15%    | 0-62.5%  |
| studies            |          |            |        |      |          |        |          |
| % unclear risk     | 82.5-85% | 87.5-92.5% | 85-95% | 10%  | 10-70%   | 20%    | 0-70%    |
| studies            |          |            |        |      |          |        |          |
| % high risk        | 0        | 0          | 0-15%  | 0    | 15-55%   | 65%    | 30-40%   |
| studies            |          |            |        |      |          |        |          |
| <b>Risperidone</b> |          |            |        |      |          |        |          |
| % low risk         | 12-65%   | 5-25%      | 0-100% | 100% | 10-72.5% | 15-80% | 0-45%    |
| studies            |          |            |        |      |          |        |          |
| % unclear risk     | 35-88%   | 75-95%     | 0-100% | 0    | 25-70%   | 40-60% | 0-80%    |
| studies            |          |            |        |      |          |        |          |
| % high risk        | 0        | 0          | 0-65%  | 0    | 20-70%   | 15-80% | 12.5-85% |
| studies            |          |            |        |      |          |        |          |

|                        |      |      |      |      |     |     |       |
|------------------------|------|------|------|------|-----|-----|-------|
| <b>Ziprasidone</b>     |      |      |      |      |     |     |       |
| % low risk studies     | 0    | 0    | 0    | 100% | 0   | 15% | 0     |
| % unclear risk studies | 100% | 100% | 100% | 0    | 15% | 0   | 32.5% |
| % high risk studies    | 0    | 0    | 0    | 0    | 85% | 85% | 67.5% |
