# Supplementary material
Source: PubMed Central journal article supplement (PMC6299187)
Supplement: Supplementary_File_2.pdf [file Supplementary_File_2.pdf]

**Supplementary File 2.** Meta-analyses of the prevalence of acute dystonia, akathisia, parkinsonism and tremor for each of the 12 antipsychotic medications investigated.

Amisulpride Acute Dystonia

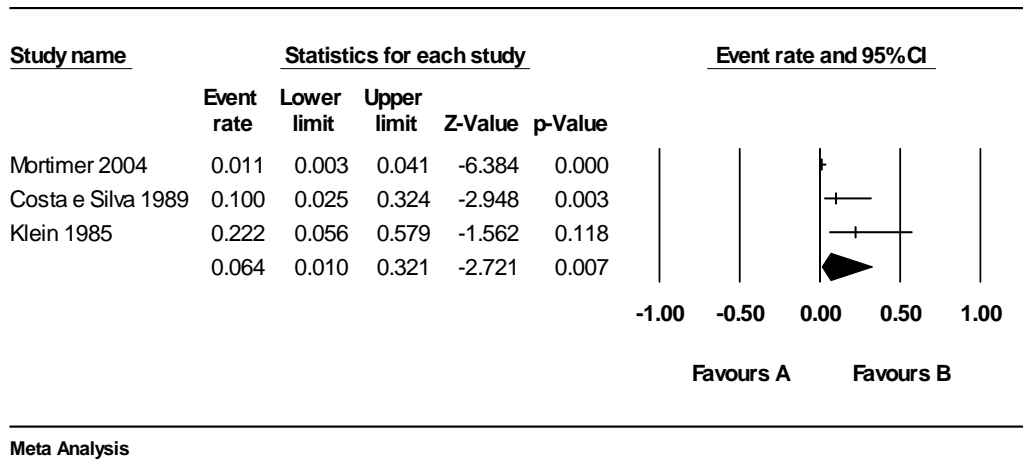

# Amisulpride Akathisia

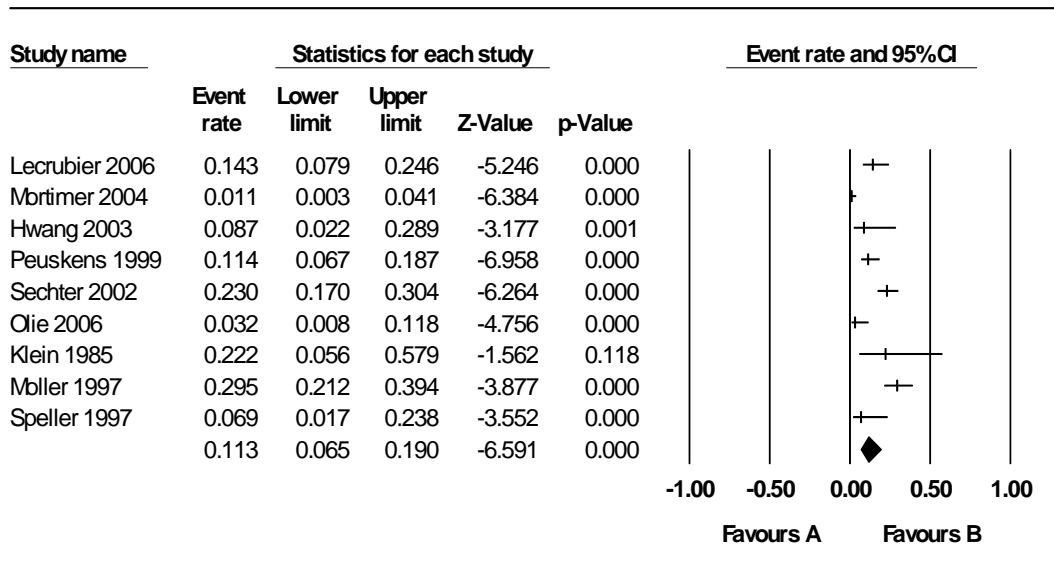

Meta Analysis

# Amisulpride Parkinsonism

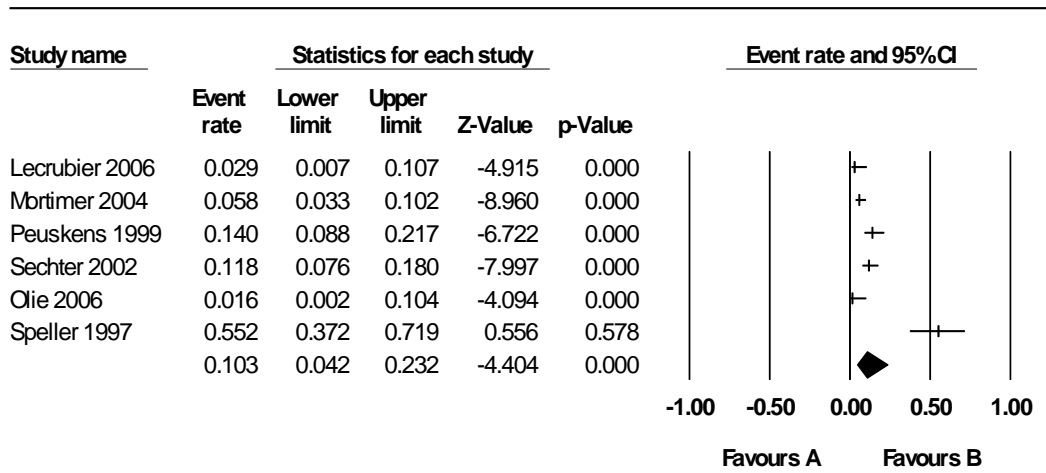

Meta Analysis

# Amisulpride Tremor

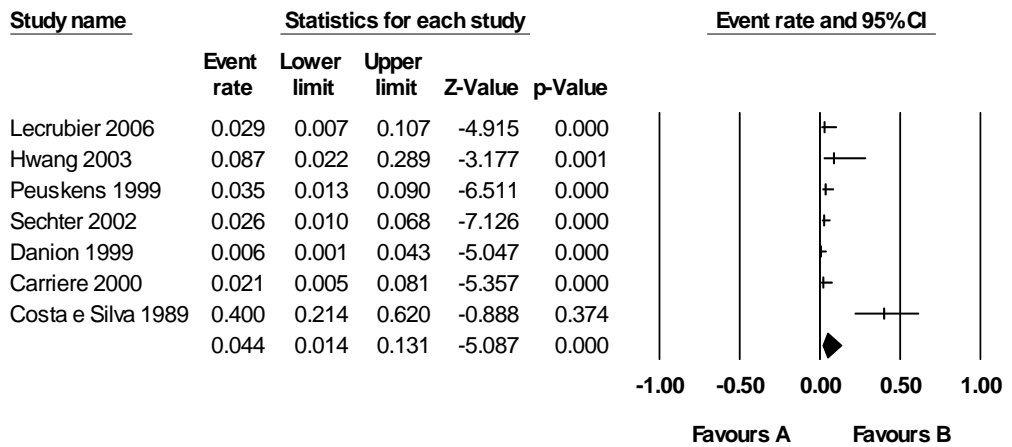

Meta Analysis

# Aripiprazole Acute Dystonia

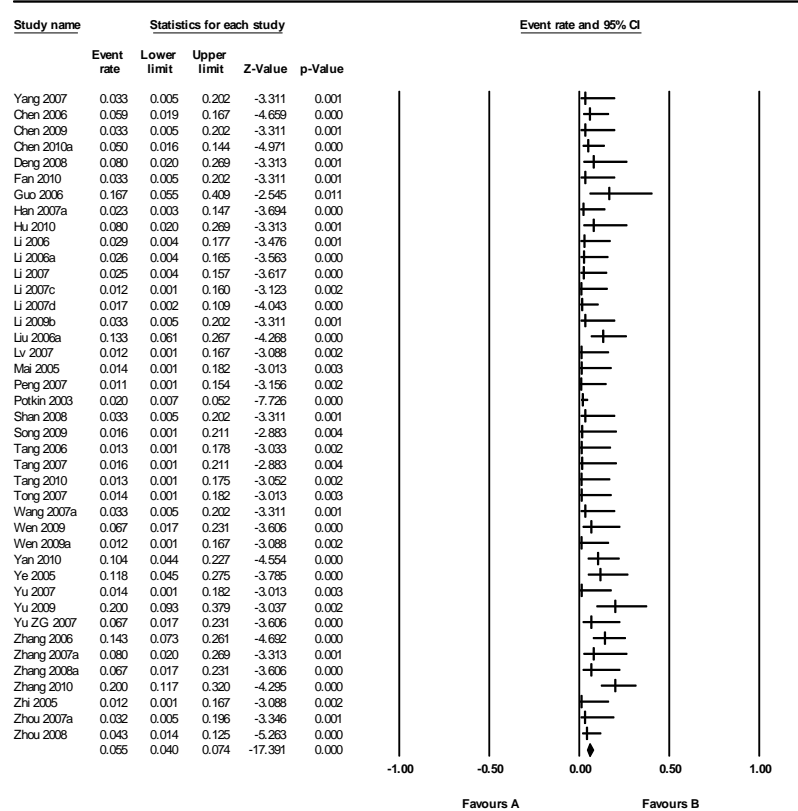

## Meta Analysis

# Meta Analysis

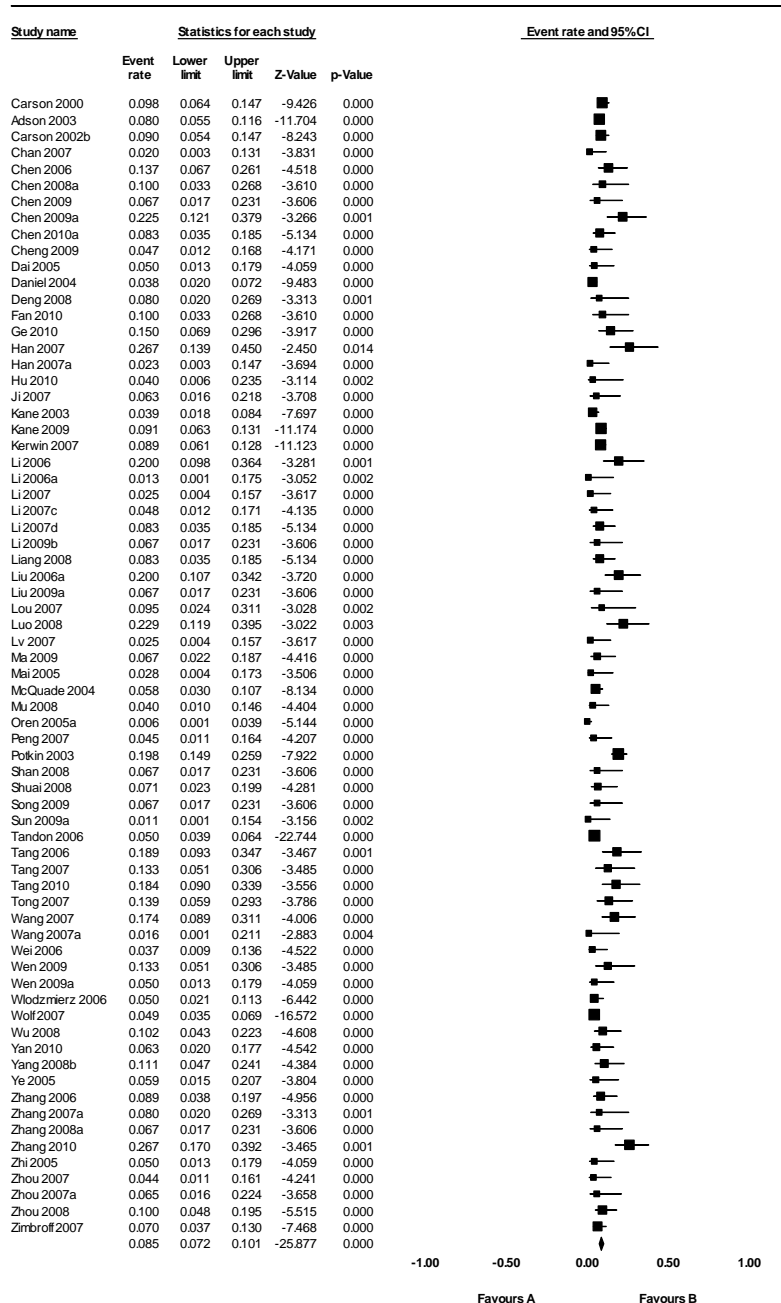

# Meta Analysis

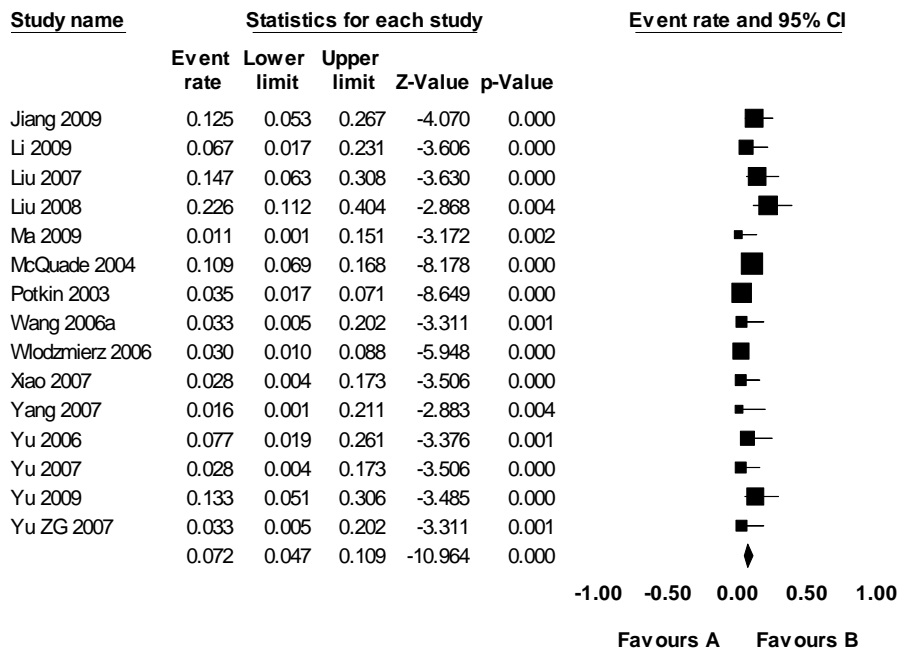

## Meta Analysis

# Meta Analysis

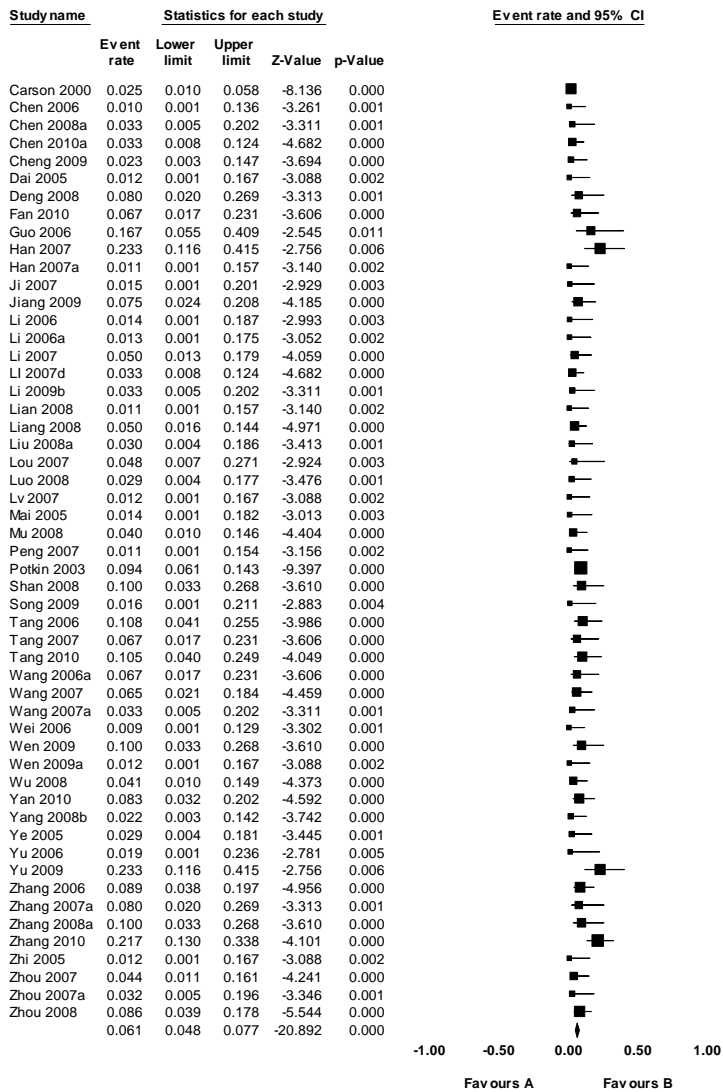

## Meta Analysis



# Meta Analysis

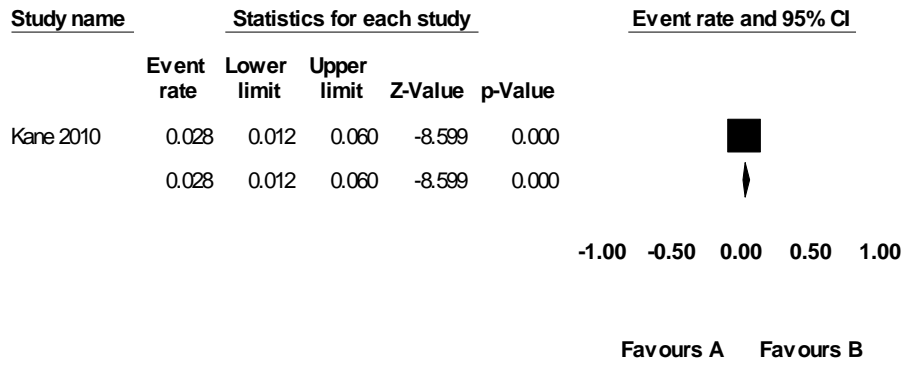

## Meta Analysis

# Meta Analysis

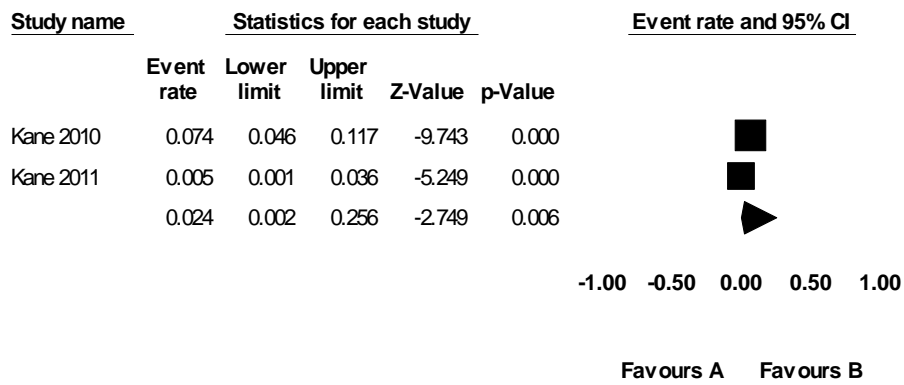

## Meta Analysis

# Meta Analysis

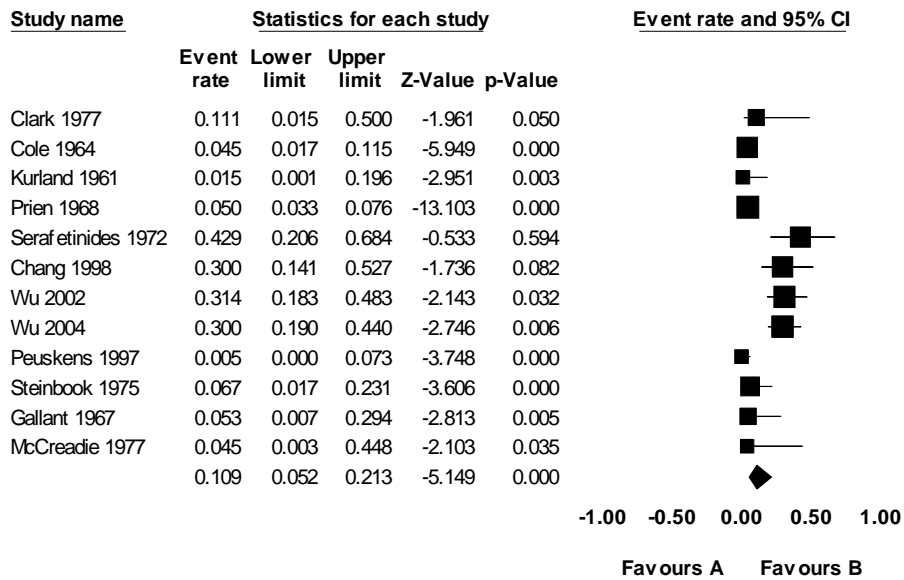

## Meta Analysis

# Meta Analysis

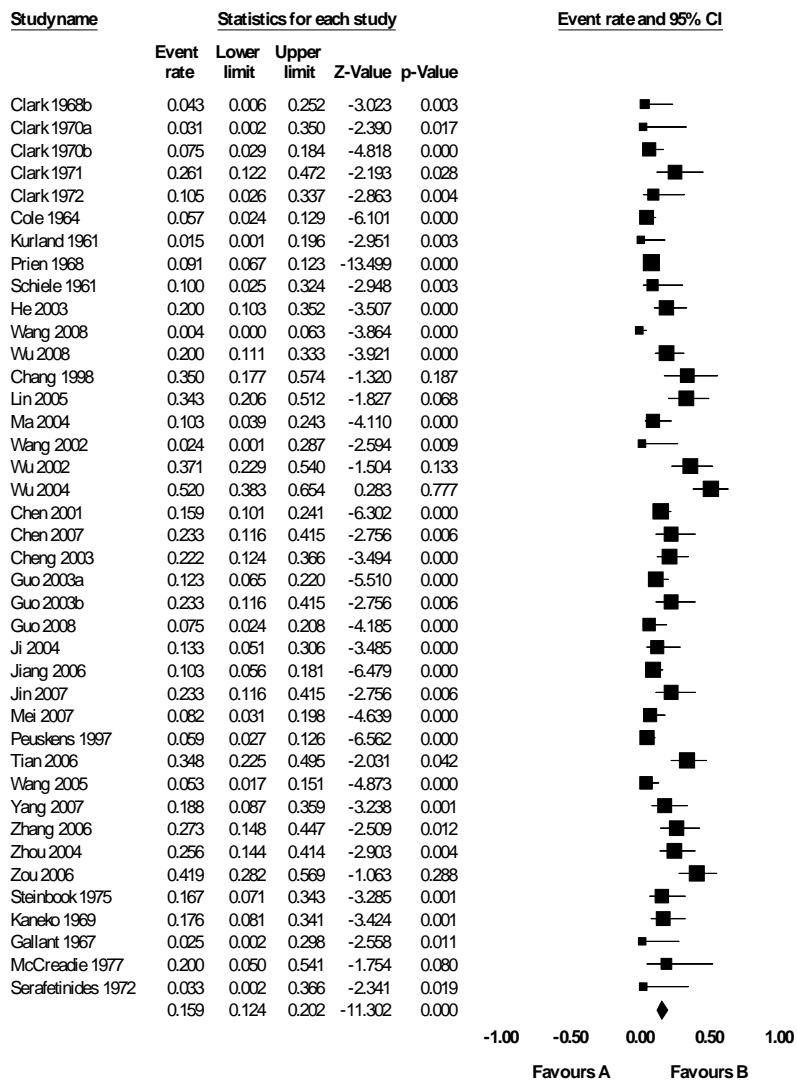

## Meta Analysis

# Meta Analysis

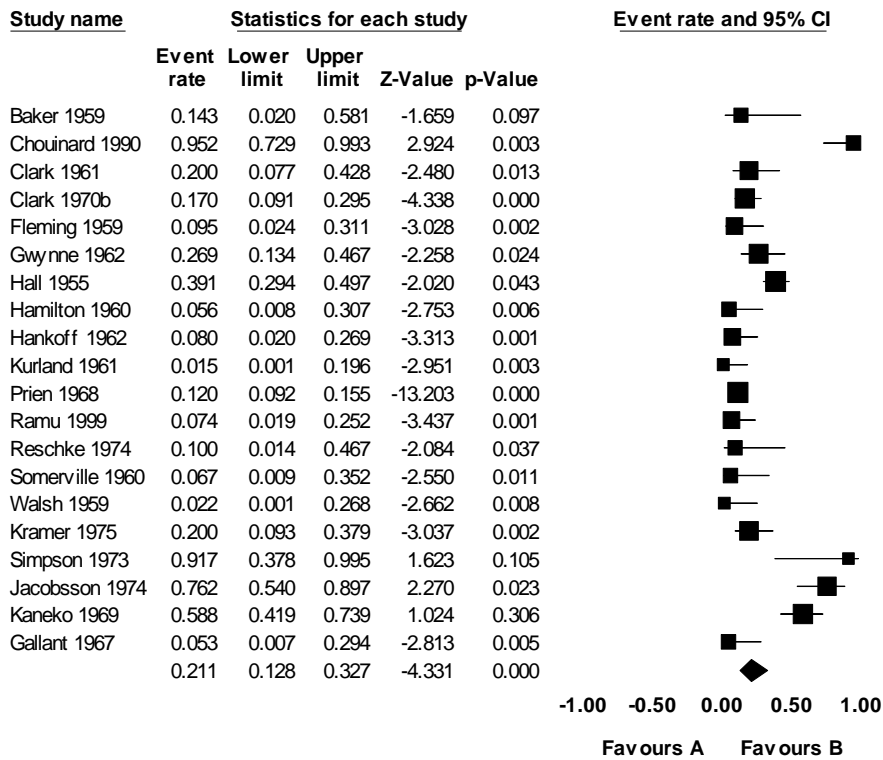

## Meta Analysis

# Meta Analysis

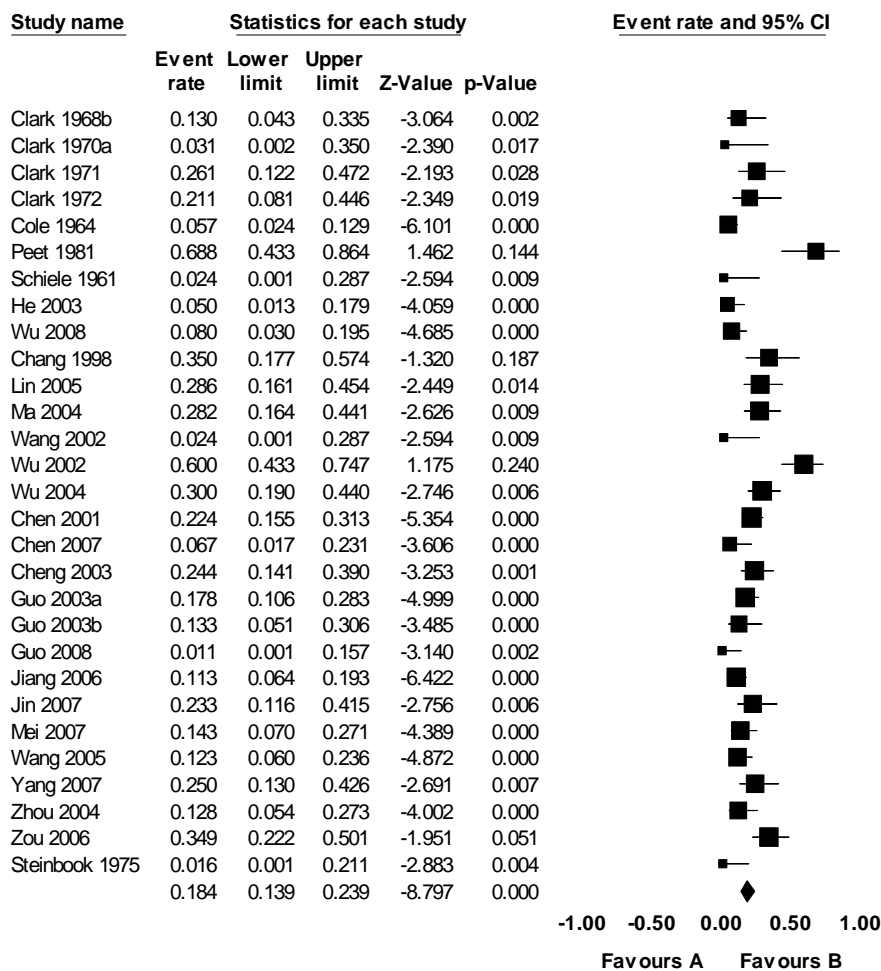

## Meta Analysis

# Meta Analysis

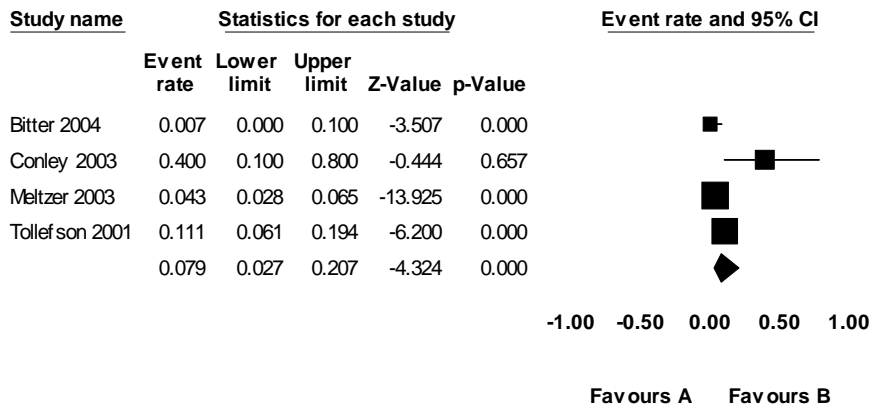

## Meta Analysis

# Meta Analysis

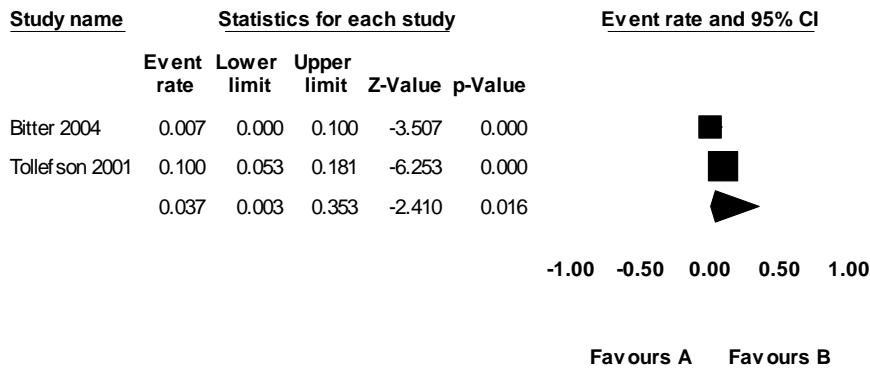

## Meta Analysis



# Meta Analysis

---

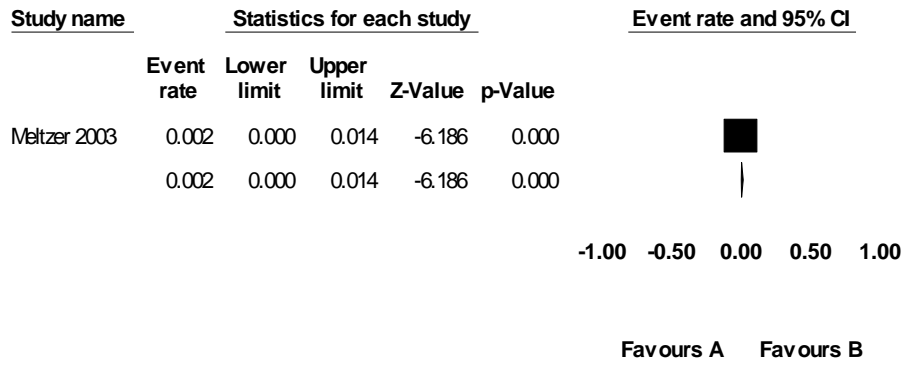

## Meta Analysis

# Meta Analysis

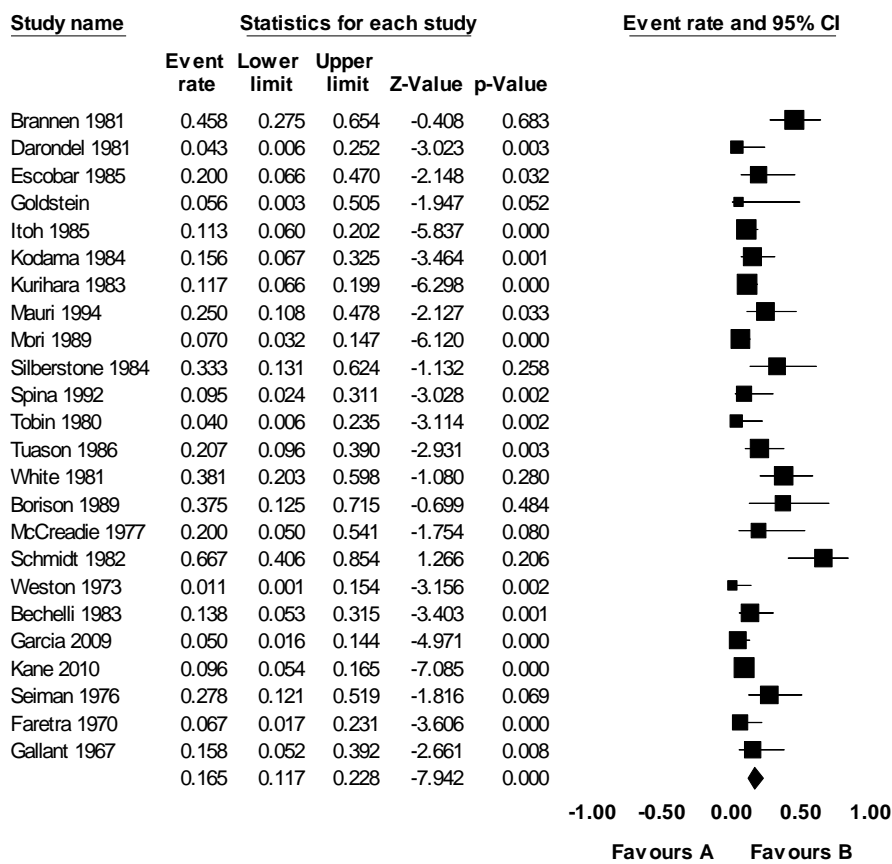

## Meta Analysis

# Meta Analysis

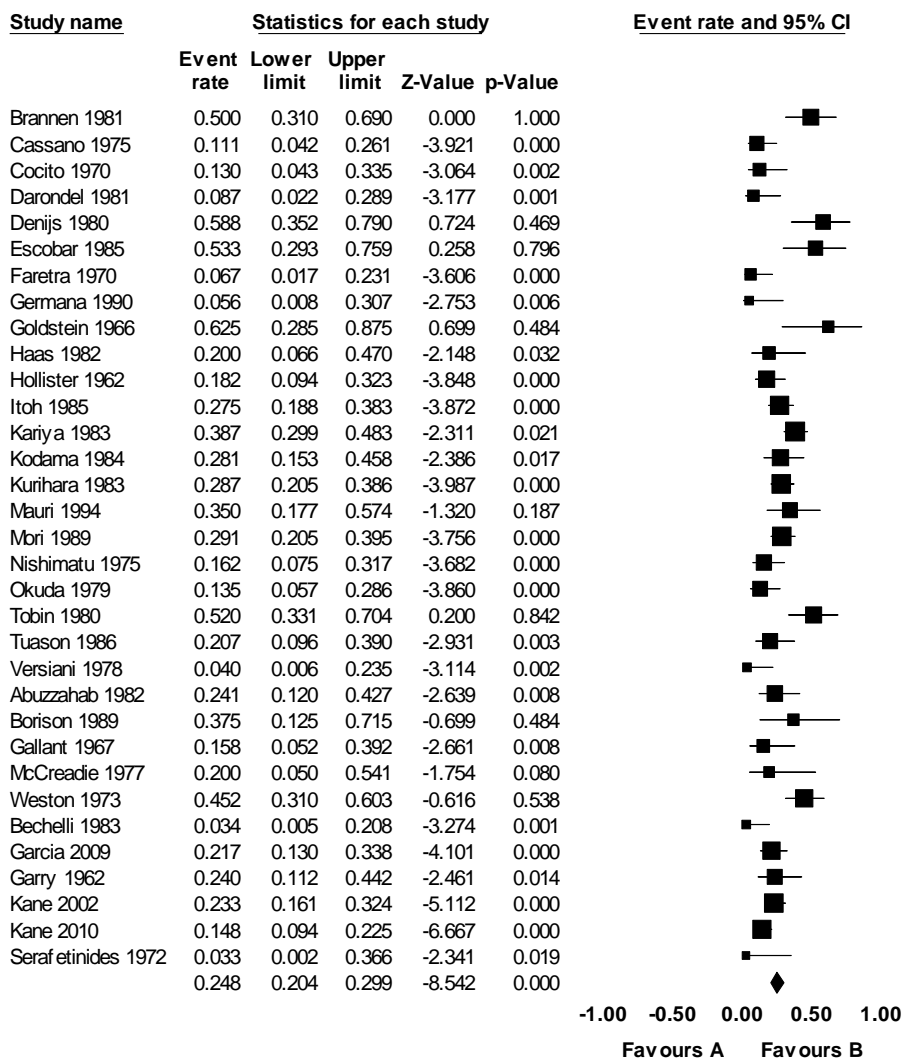

## Meta Analysis

# Meta Analysis

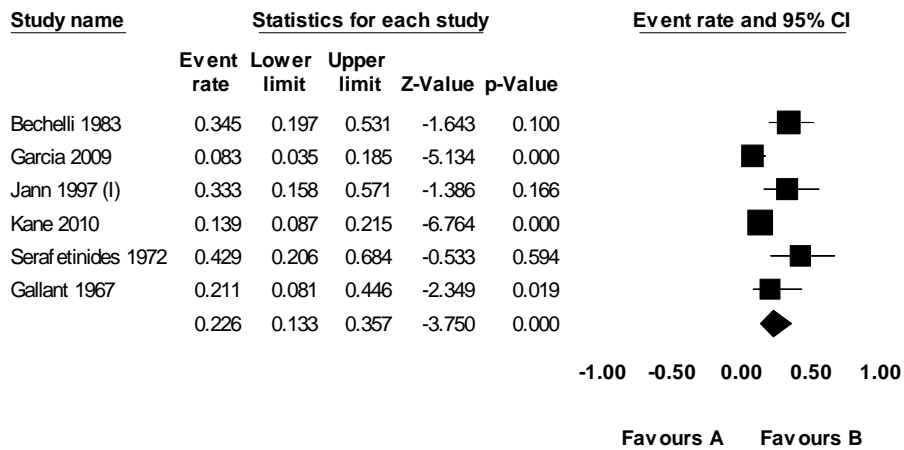

## Meta Analysis

# Meta Analysis

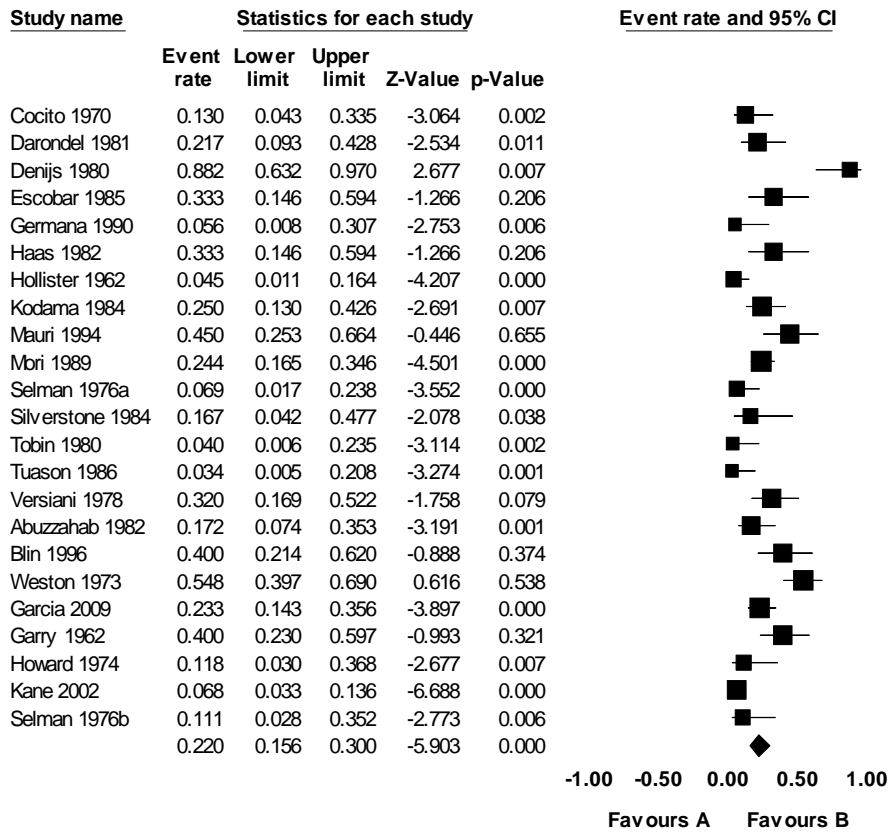

## Meta Analysis

# Meta Analysis

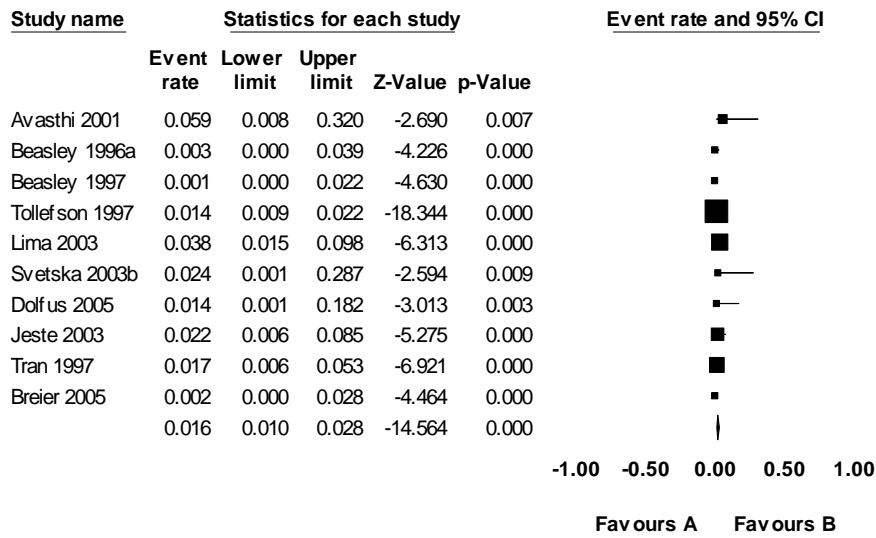

## Meta Analysis

# Meta Analysis

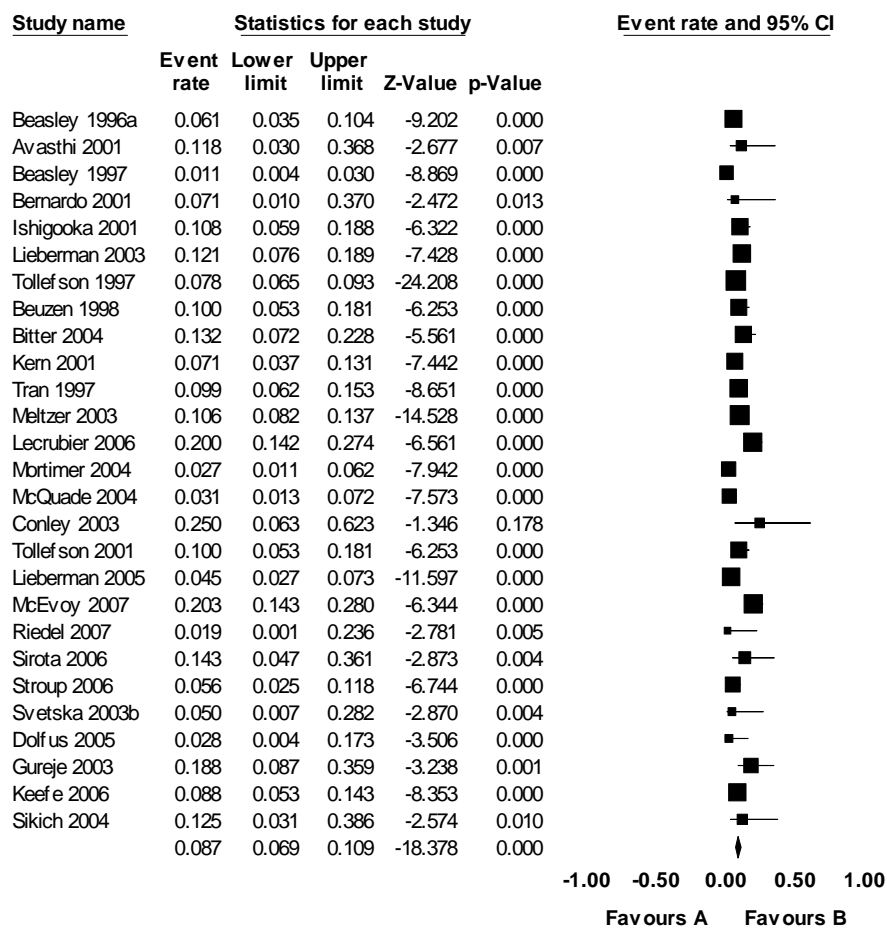

Meta Analysis

# Meta Analysis

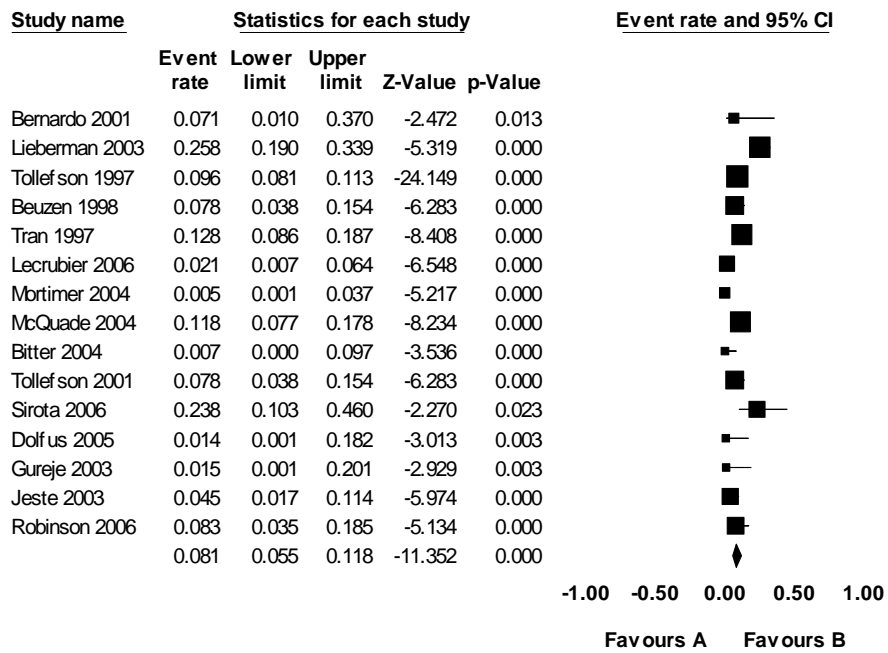

## Meta Analysis



# Meta Analysis

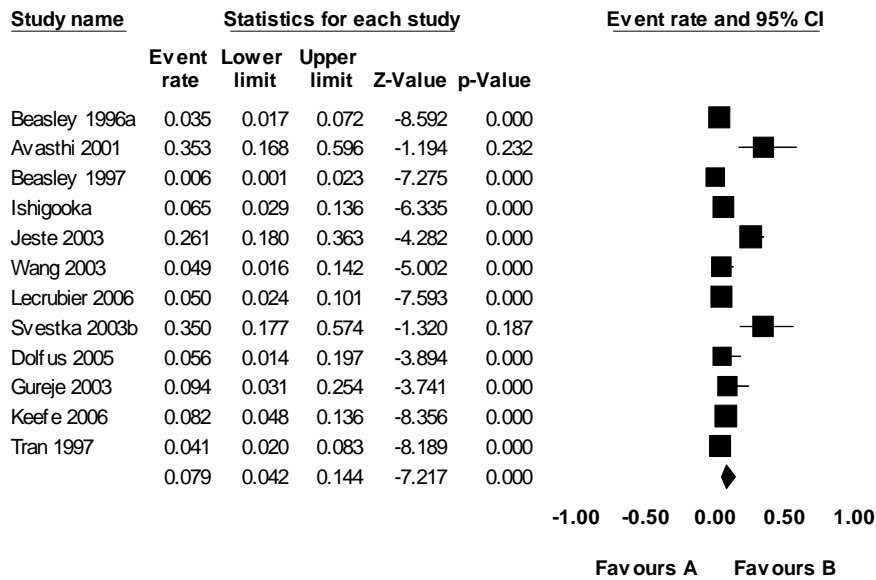

## Meta Analysis

# Meta Analysis

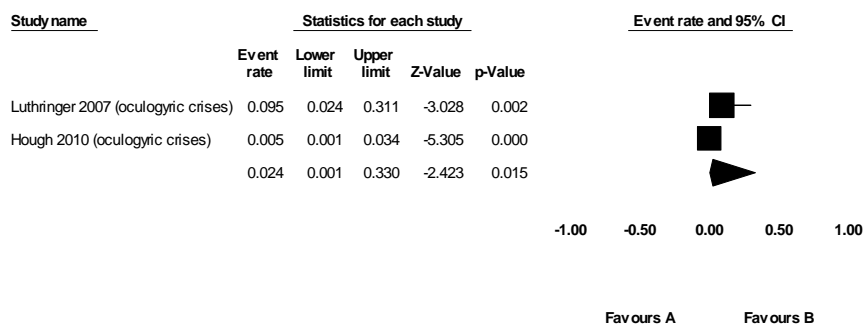

## Meta Analysis

# Meta Analysis

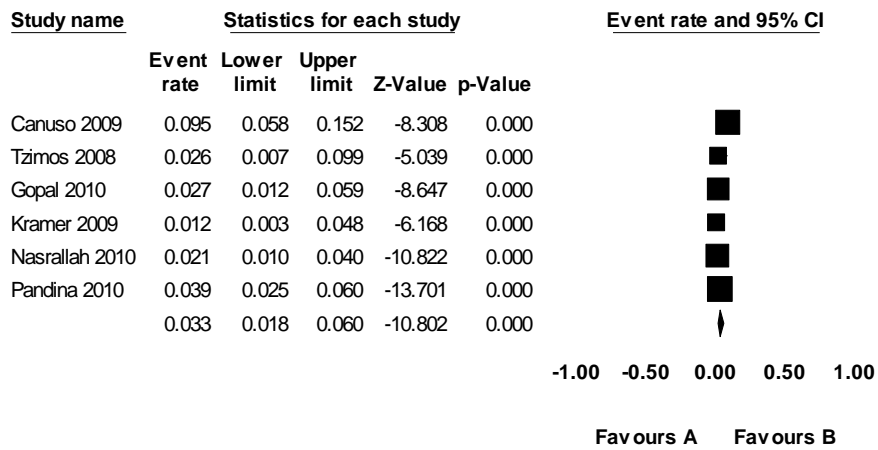

## Meta Analysis

# Meta Analysis

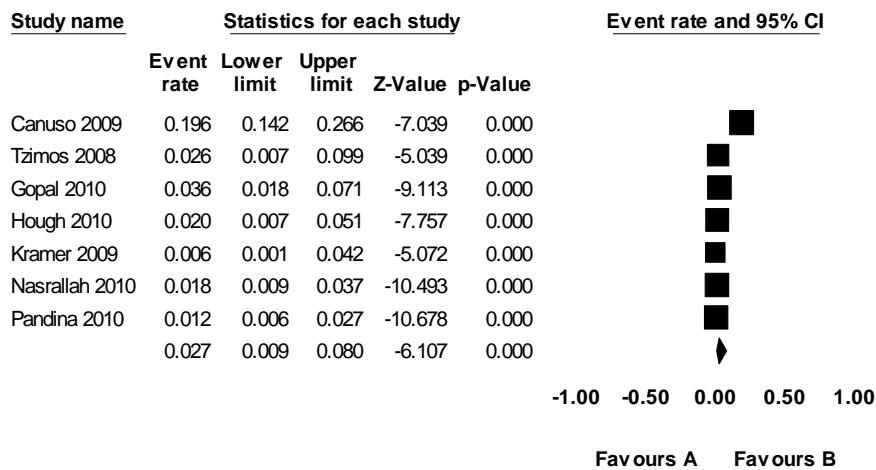

## Meta Analysis

# Meta Analysis

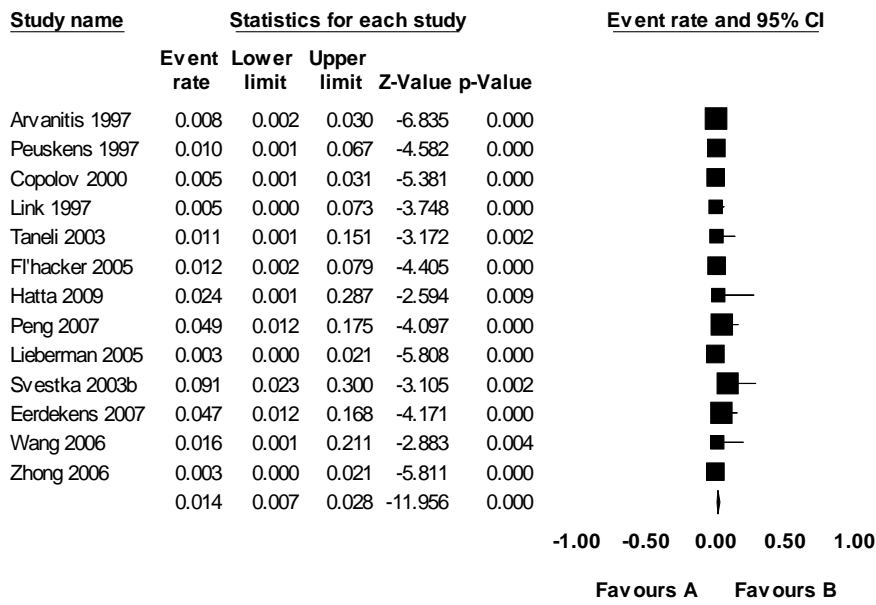

## Meta Analysis

# Meta Analysis

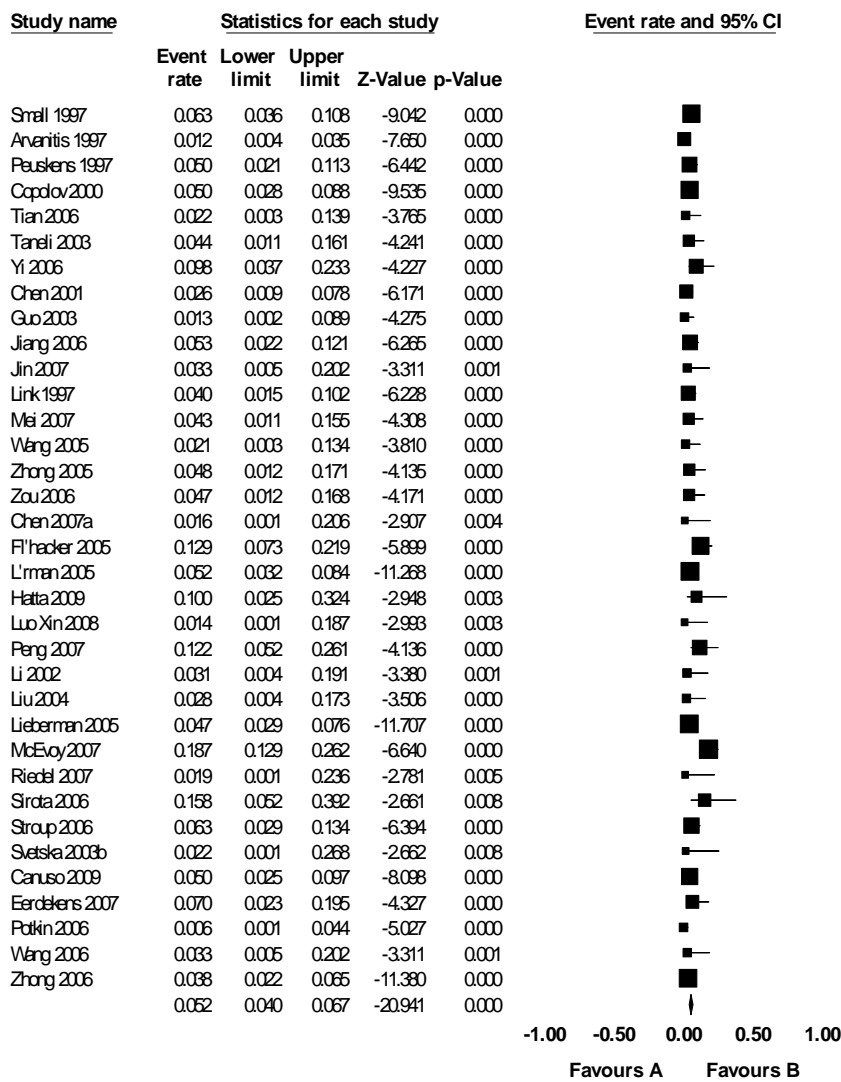

## Meta Analysis

# Meta Analysis

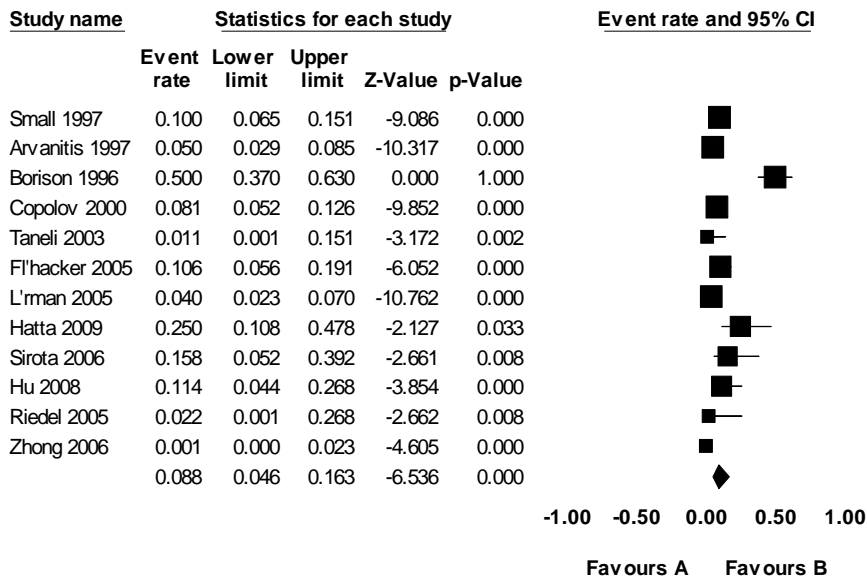

## Meta Analysis

# Meta Analysis

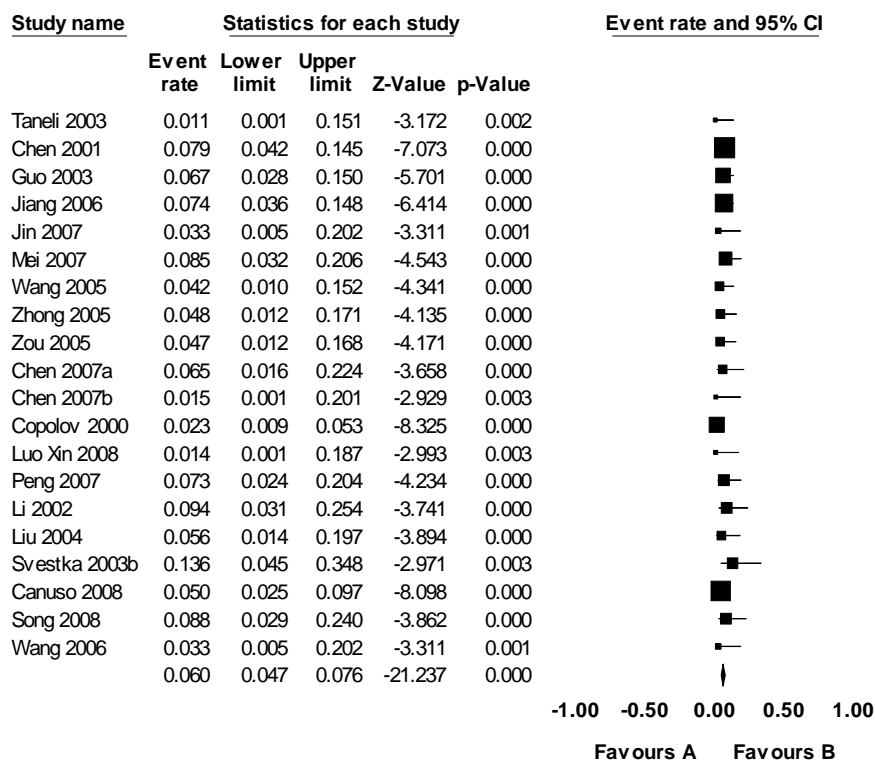

## Meta Analysis



# Meta Analysis

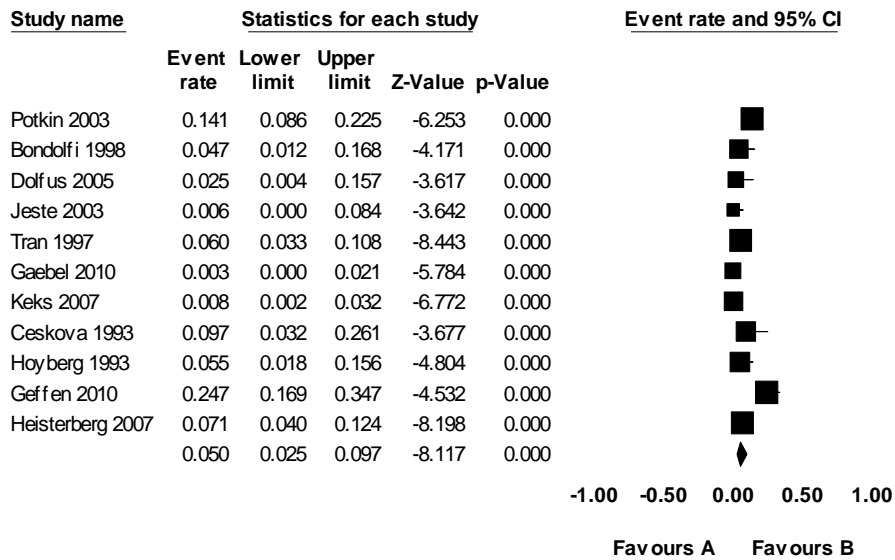

## Meta Analysis

# Meta Analysis

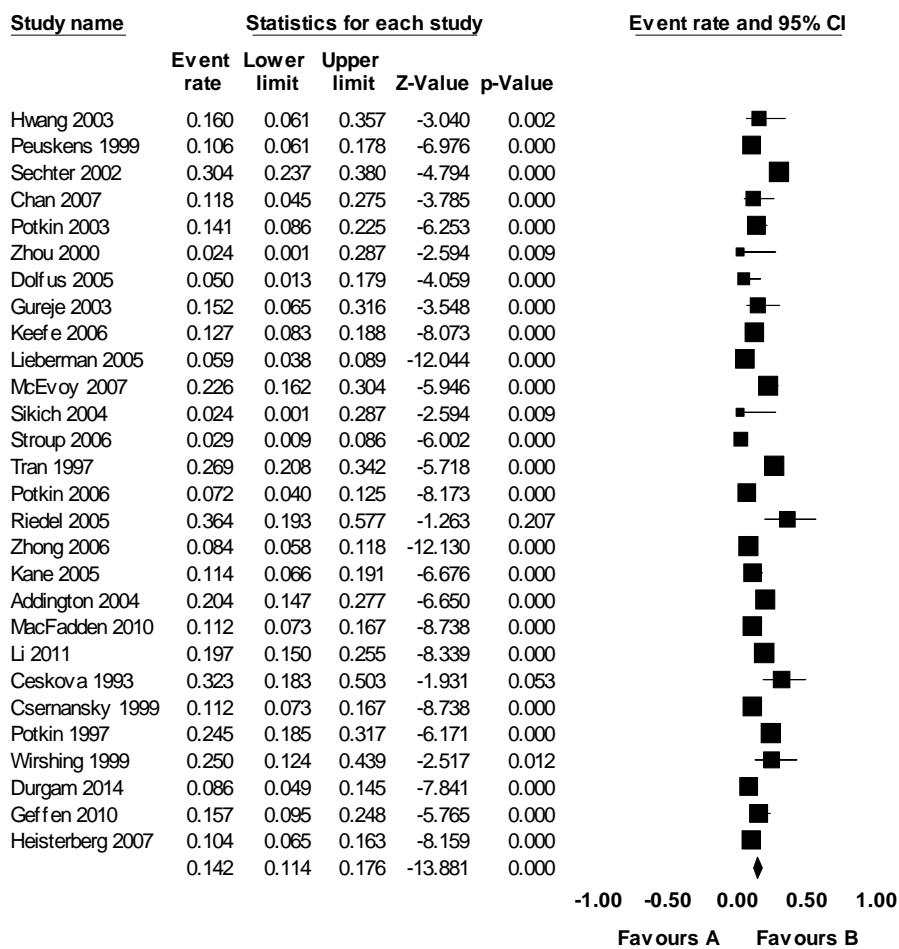

## Meta Analysis

# Meta Analysis

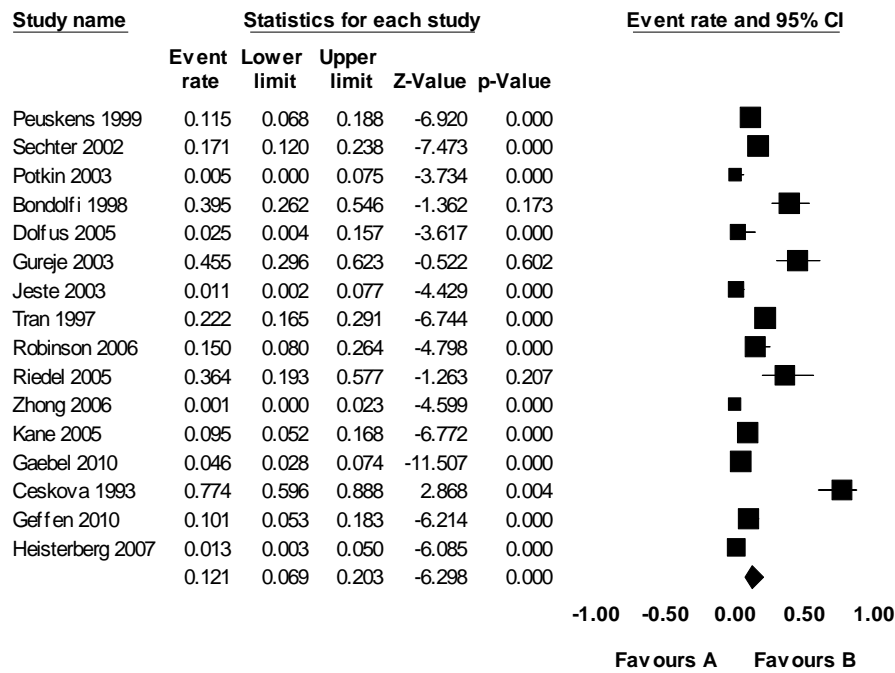

## Meta Analysis

# Meta Analysis

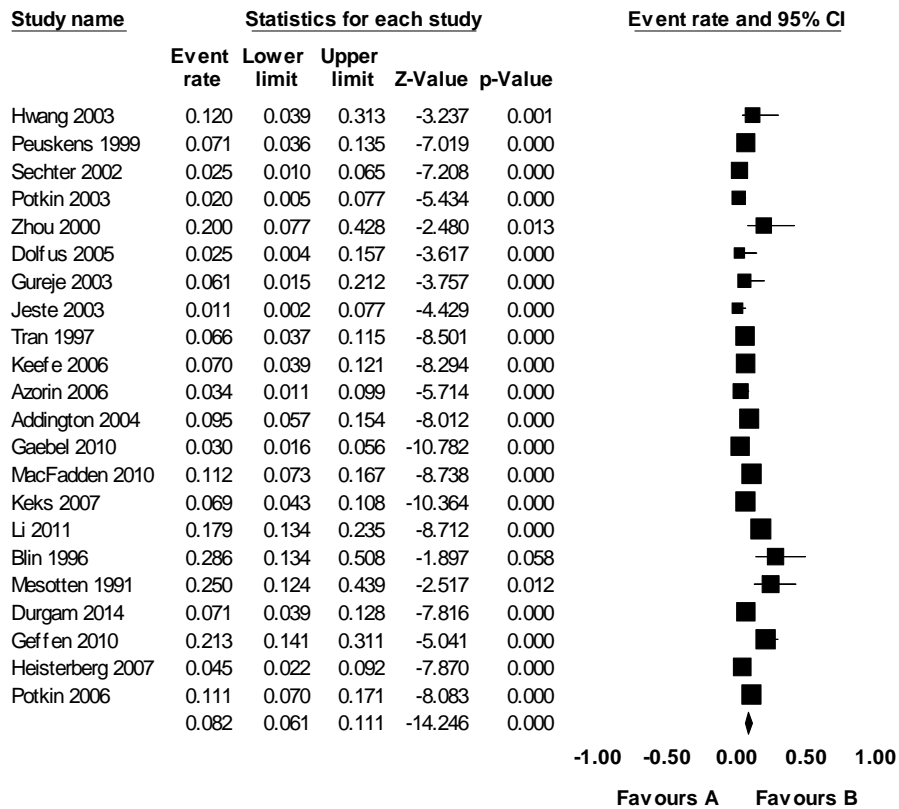

## Meta Analysis

# Meta Analysis

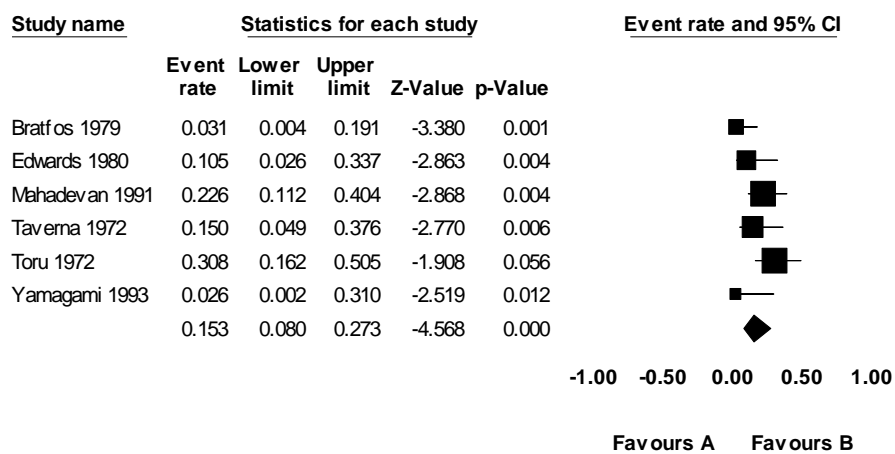

## Meta Analysis

# Meta Analysis

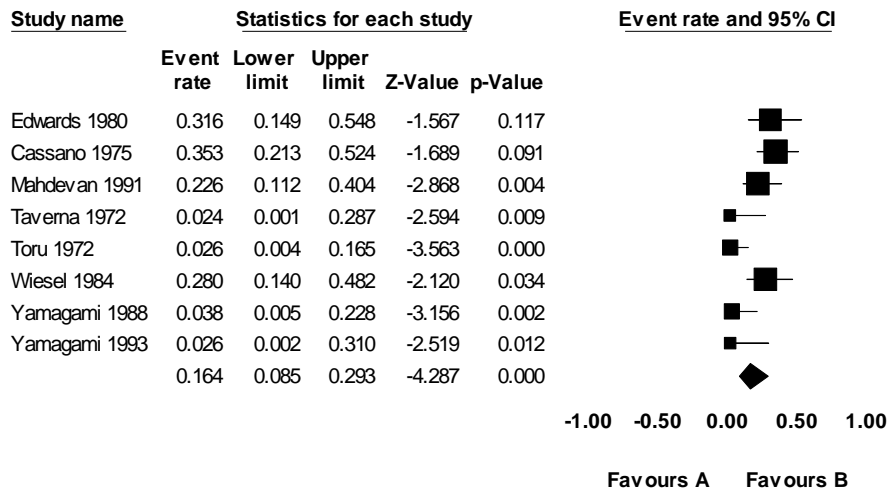

## Meta Analysis

# Meta Analysis

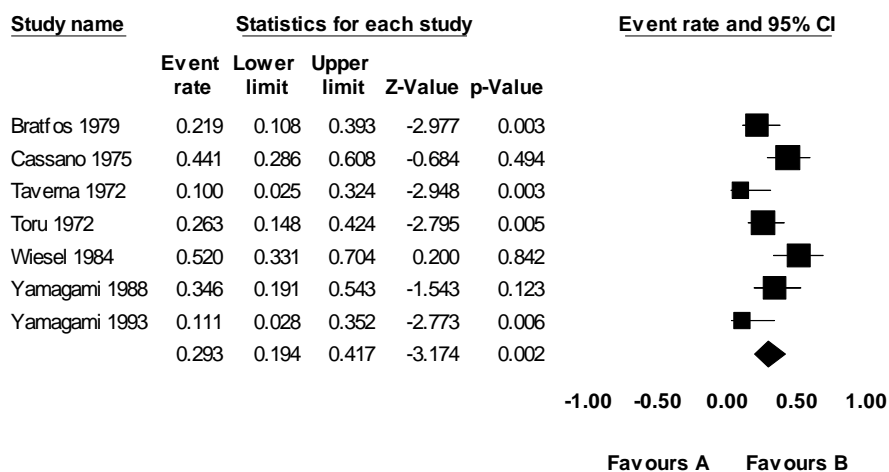

## Meta Analysis

# Meta Analysis

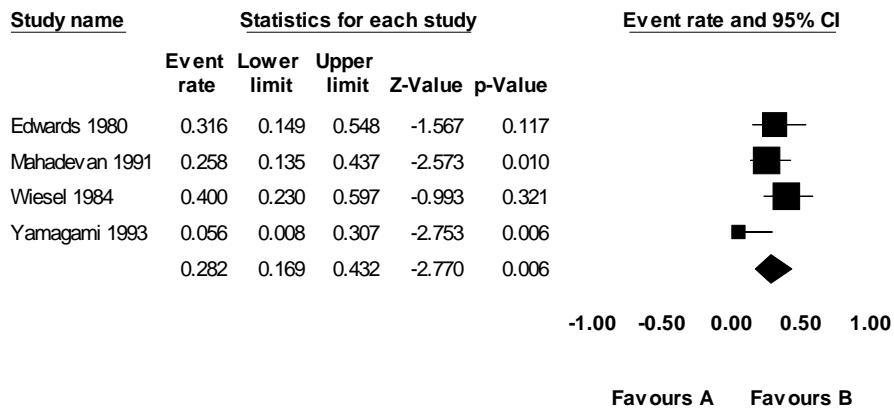

## Meta Analysis



# Meta Analysis

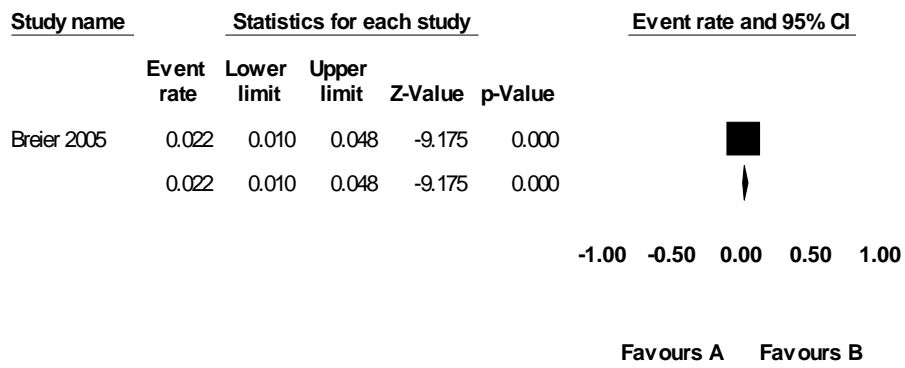

Meta Analysis

# Meta Analysis

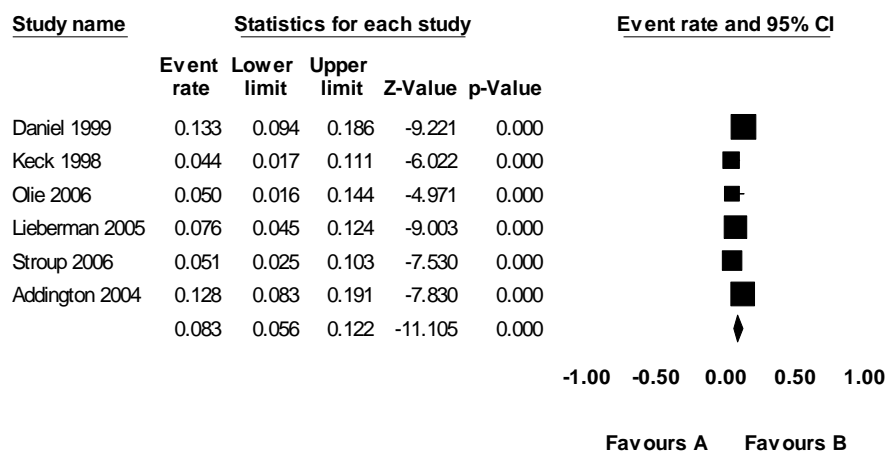

## Meta Analysis

# Meta Analysis

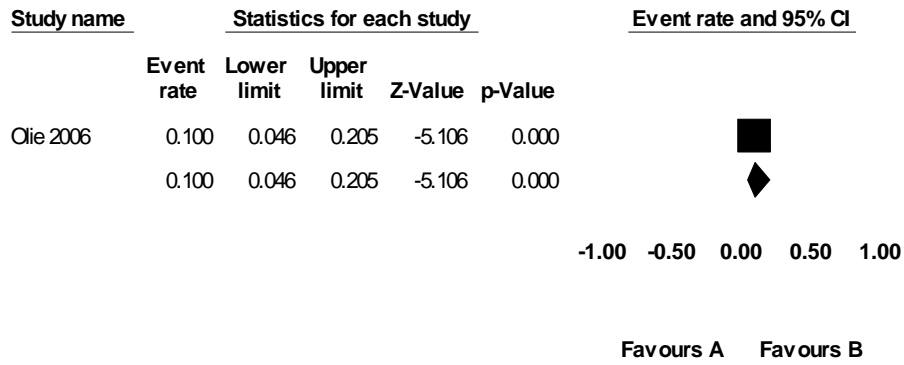

Meta Analysis

# Meta Analysis

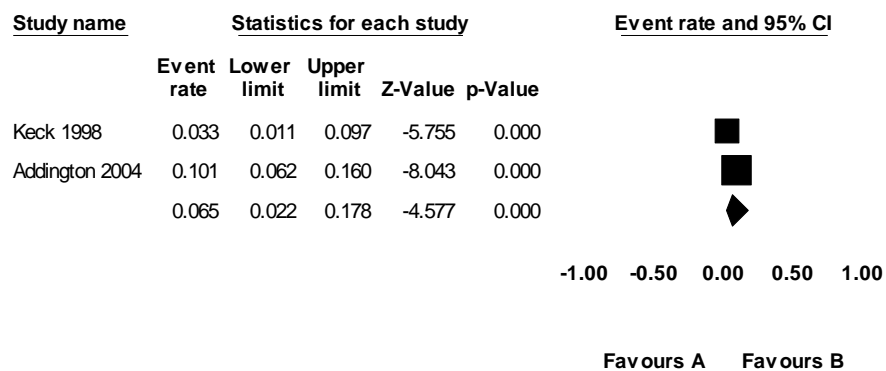

## Meta Analysis
